# Supplementary material for: Abundance, Biomass, and Production of Bacterioplankton at the End of the Growing Season in the Western Laptev Sea: Impact of Khatanga River Discharge (Arctic)
Source: MDPI journal article supplement (doi:10.3390/jmse11081573), 2023-08-10
Supplement: s1 [file s1]

## Supplementary Materials

### Abundance, biomass and production of bacterioplankton at the end of the growing season in the western Laptev Sea: influence of discharge of Khatanga River (Arctic)

Alexander I. Kopylov<sup>1\*</sup>, Dmitriy B. Kosolapov<sup>1</sup>, Anna V. Romanenko<sup>1</sup>, Elena A. Zabolotkina<sup>1</sup>, Andrey F. Sazhin<sup>2\*</sup>

<sup>1</sup> Papanin Institute for Biology of Inland Waters Russian Academy of Sciences, Borok, Yaroslavl oblast, Russia

<sup>2</sup> Shirshov Institute of Oceanology of Russian Academy of Sciences, Moscow, Russia

Table S1. Abundance of suspended particles of different size classes (NP, particles mL<sup>-1</sup>) and mass of suspended particles of different size classes (MP, mg m<sup>-3</sup>) along the transect.

| Station | Horizon, m | Parameter | Particle size classes, µm |        |        |         |        |
|---------|------------|-----------|---------------------------|--------|--------|---------|--------|
|         |            |           | 3–10                      | >10–20 | >20–50 | >50–210 | 3–210  |
| 5627    | 0          | NP        | 131400                    | 27800  | 16500  | 278     | 175978 |
|         | 0          | MP        | 7753                      | 17931  | 108372 | 53050   | 187122 |
|         | 5          | NP        | 76100                     | 42500  | 12400  | 227     | 131227 |
|         | 5          | MP        | 6468                      | 17585  | 316076 | 39958   | 380087 |
|         | 12         | NP        | 162900                    | 70700  | 49000  | 177     | 282777 |
|         | 12         | MP        | 14498                     | 52672  | 65170  | 73334   | 205674 |
| 5630    | 0          | NP,       | 12200                     | 4400   | 3400   | 21      | 20021  |
|         | 0          | MP        | 1049                      | 3507   | 8364   | 2374    | 15294  |
|         | 5          | NP,       | 13100                     | 6200   | 0      | 25      | 19325  |
|         | 5          | MP        | 1441                      | 4811   | 0      | 2826    | 9078   |
|         | 20         | NP        | 84900                     | 20200  | 15600  | 21      | 120721 |
|         | 20         | MP        | 6198                      | 9130   | 43742  | 3956    | 63026  |
|         | 23         | NP        | 108300                    | 56300  | 23700  | 21      | 188321 |
|         | 23         | MP        | 10397                     | 58439  | 119401 | 2374    | 190611 |
| 5631    | 0          | NP        | 6000                      | 1200   | 3600   | 0       | 10800  |
|         | 0          | MP        | 546                       | 1004   | 9180   | 0       | 10730  |
|         | 10         | NP        | 6700                      | 2900   | 2900   | 0       | 12500  |
|         | 10         | MP        | 549                       | 2520   | 7018   | 0       | 10087  |

|        |    |    |      |      |       |   |       |
|--------|----|----|------|------|-------|---|-------|
|        | 18 | NP | 6800 | 4400 | 2200  | 0 | 13400 |
|        | 18 | MP | 1020 | 2570 | 3194  | 0 | 6784  |
|        | 25 | NP | 6000 | 1000 | 3900  | 0 | 10900 |
|        | 25 | MP | 678  | 1266 | 4323  | 0 | 6267  |
| 5632   | 0  | NP | 1100 | 3400 | 3300  | 0 | 7800  |
|        | 0  | MP | 216  | 4032 | 51562 | 0 | 55810 |
|        | 10 | NP | 2900 | 1900 | 0     | 0 | 4800  |
|        | 10 | MP | 438  | 1212 | 0     | 0 | 1650  |
|        | 17 | NP | 5200 | 3200 | 0     | 0 | 8400  |
|        | 17 | MP | 359  | 1875 | 0     | 0 | 2234  |
|        | 22 | NP | 1200 | 2400 | 0     | 0 | 3600  |
|        | 22 | MP | 54   | 1927 | 0     | 0 | 1981  |
| 5591-2 | 0  | NP | 600  |      |       | 0 | 600   |
|        | 0  | MP | 158  | 0    | 0     | 0 | 158   |
|        | 13 | NP | 1000 | 500  | 0.5   | 0 | 2000  |
|        | 13 | MP | 25   | 990  | 1436  | 0 | 2451  |
|        | 41 | NP | 7000 | 4200 | 0.    | 0 | 11200 |
|        | 41 | MP | 483  | 3604 | 0     | 0 | 4087  |
| 5590-2 | 0  | NP | 0    | 6300 | 0     | 0 | 6300  |
|        | 0  | MP | 0    | 4442 | 0     | 0 | 4442  |
|        | 13 | NP | 1800 | 700  | 0.    | 0 | 2500  |
|        | 13 | MP | 142  | 816  | 0     | 0 | 958   |
|        | 59 | NP | 900  | 1000 | 0     | 0 | 1900  |
|        | 59 | MP | 80   | 823  | 0     | 0 | 903   |
| 5634   | 0  | NP | 1427 | 0    | 0     | 0 | 1427  |
|        | 0  | MP | 27   | 0    | 0     | 0 | 27    |
|        | 10 | NP | 1427 | 0    | 0     | 0 | 1427  |
|        | 10 | MP | 66   | 0    | 0     | 0 | 66    |
|        | 40 | NP | 79   | 0    | 0     | 0 | 79    |
|        | 40 | MP | 6    | 0    | 0     | 0 | 6     |
|        | 60 | NP | 3140 | 0    | 0     | 0 | 3140  |
|        | 60 | MP | 471  | 0    | 0     | 0 | 471   |

|      |     |    |        |    |   |    |      |
|------|-----|----|--------|----|---|----|------|
| 5635 | 100 | NP | 126    | 0  | 0 | 0  | 126  |
|      | 100 | MP | 25     | 0  | 0 | 0  | 25   |
|      | 182 | NP | 126    | 0  | 0 | 0  | 126  |
|      | 182 | MP | 25     | 0  | 0 | 0  | 25   |
|      | 0   | NP | 174    | 48 | 0 | 0  | 222  |
|      | 0   | MP | 12     | 39 | 0 | 0  | 51   |
|      | 5   | NP | 174    | 40 | 0 | 00 | 222  |
|      | 5   | MP | 12     | 33 | 0 | 0  | 45   |
|      | 75  | NP | 79     | 0  | 0 | 0  | 79   |
|      | 75  | MP | 6      | 0  | 0 | 0  | 6    |
|      | 140 | NP | 79     | 0  | 0 | 0  | 79   |
|      | 140 | MP | 6      | 0  | 0 | 0  | 6    |
|      | 320 | NP | 96     | 0  | 0 |    | 96   |
|      | 320 | MP | 7      | 0  | 0 | 0  | 7    |
|      | 850 | NP | 2100   | 0  | 0 | 0  | 2100 |
|      | 850 | MP | 88.200 | 0  | 0 | 0  | 88   |

Table S2. Abundance ( $10^3$  cels mL<sup>-1</sup>) of free-living bacteria, particle-associated bacteria, bacteria in microcolony and total abundance of bacterioplankton.

| Station | Horizon, m | Free-living bacteria | Particle-associated bacteria | Bacteria in microcolony | Total abundance |
|---------|------------|----------------------|------------------------------|-------------------------|-----------------|
| 5627    | 0          | 650.2                | 640.5                        | 52,3                    | 1343.0          |
|         | 5          | 412.6                | 999.3                        | 213,1                   | 1625.0          |
|         | 12         | 379.1                | 1497.0                       | 0                       | 1876.7          |
| 5630    | 0          | 950.7                | 806.2                        | 82,0                    | 1838.9          |
|         | 5          | 1246.0               | 1049.0                       | 16,8                    | 2311.8          |
|         | 20         | 936.8                | 763.3                        | 0                       | 1700.1          |
|         | 23         | 657.0                | 1000.1                       | 0                       | 1657.1          |
| 5631    | 0          | 521.4                | 382.6                        | 0                       | 904.0           |
|         | 10         | 511.5                | 310.8                        | 0                       | 822.3           |
|         | 18         | 1155.5               | 380.1                        | 0                       | 1535.6          |
|         | 25         | 494.9                | 309.0                        | 0                       | 803.9           |
| 5632    | 0          | 463.7                | 282.6                        | 0                       | 746.3           |
|         | 10         | 532.3                | 55.8                         | 50.6                    | 638.7           |
|         | 17         | 338.8                | 151.8                        | 0                       | 490.6           |
|         | 22         | 356.2                | 100.2                        | 8.5                     | 464.9           |
| 5591-2  | 0          | 420.8                | 7,9                          | 0                       | 428.7           |
|         | 13         | 163,8                | 10,1                         | 0                       | 173.9           |
|         | 41         | 62,8                 | 40,1                         | 0                       | 102.9           |
| 5590-2  | 0          | 407.8                | 31,4                         | 0                       | 439.2           |
|         | 13         | 130.4                | 13,2                         | 0                       | 143.6           |
|         | 59         | 137.7                | 2.0                          | 0                       | 139.7           |
| 5634    | 0          | 366.9                | 11.4                         | 27.1                    | 405.4           |
|         | 10         | 267.6                | 54.1                         | 0                       | 321.7           |
|         | 40         | 87.3                 | -                            | 0                       | 87.3            |
|         | 60         | 251.1                | 7.0                          | 0                       | 258.1           |
|         | 100        | 159.9                | 1.0                          | 0                       | 160.9           |
|         | 182        | 245.8                | 0                            | 0                       | 245.8           |
| 5635    | 0          | 277.1                | 1.4                          | 10.4                    | 288.9           |
|         | 5          | 154.3                | 4.7                          | 0                       | 159.0           |
|         | 27         | 80.8                 | 0                            | 0                       | 80.8            |
|         | 75         | 157.9                | 0.4                          | 5,6                     | 163.9           |
|         | 140        | 237.7                | 0.1                          | 0                       | 237.8           |
|         | 320        | 269.8                | 0.3                          | 0                       | 270.12          |
|         | 850        | 267.9                | 8.4                          | 5,2                     | 281.5           |

Table S3. Mean volume of bacterial cell ( $\mu\text{m}^3$ ) of free-living bacteria, particle-associated bacteria, bacteria in microcolony.

| Station | Horizon, m | Free-living bacteria | Particle-associated bacteria | Bacteria in microcolony |
|---------|------------|----------------------|------------------------------|-------------------------|
| 5627    | 0          | 0.087                | 0.087                        | 0.117                   |
|         | 5          | 0.093                | 0.062                        | 0.314                   |
|         | 12         | 0.065                | 0.054                        | 0                       |
| 5630    | 0          | 0.101                | 0.037                        | 0.108                   |
|         | 5          | 0.099                | 0.062                        | 0.100                   |
|         | 20         | 0.072                | 0.054                        | 0                       |
|         | 23         | 0.095                | 0.062                        | 0                       |
| 5631    | 0          | 0.08                 | 0.100                        | 0                       |
|         | 10         | 0.092                | 0.074                        | 0                       |
|         | 18         | 0.089                | 0.061                        | 0                       |
|         | 25         | 0.098                | 0.081                        | 0                       |
| 5632    | 0          | 0.086                | 0.071                        | 0                       |
|         | 10         | 0.060                | 0.043                        | 0.104                   |
|         | 17         | 0.080                | 0.064                        | 0                       |
|         | 22         | 0.092                | 0.053                        | 0.093                   |
| 5591-2  | 0          | 0.094                | 0.066                        | 0                       |
|         | 13         | 0.043                | 0.062                        | 0                       |
|         | 41         | 0.066                | 0.044                        | 0                       |
| 5590-2  | 0          | 0.040                | 0.053                        | 0                       |
|         | 13         | 0.058                | 0.054                        | 0                       |
|         | 59         | 0.075                | 0.057                        | 0                       |
| 5634    | 0          | 0.068                | 0.084                        | 0.080                   |
|         | 10         | 0.063                | 0.073                        | 0                       |
|         | 40         | 0.072                | 0                            | 0                       |
|         | 60         | 0.073                | 0.054                        | 0                       |
|         | 100        | 0.075                | 0.076                        | 0                       |
|         | 182        | 0.058                | 0                            | 0                       |
| 5635    | 0          | 0.054                | 0.056                        | 0.074                   |
|         | 5          | 0.053                | 0.05                         | 0                       |
|         | 27         | 0.084                | 0.065                        | 0                       |
|         | 75         | 0.074                | 0.056                        | 0.163                   |
|         | 140        | 0.058                | 0.058                        | 0                       |
|         | 320        | 0.067                | 0.067                        | 0                       |
|         | 850        | 0.064                | 0.075                        | 0.110                   |

Table S4. Biomass [ $\text{mg m}^{-3}$  ( $\text{mg C m}^{-3}$ )] of free-living bacteria, particle-associated bacteria, bacteria in microcolony and total biomass of bacterioplankton.

| Station | Horizon, m | Free-living bacteria | Particle-associated bacteria | Bacteria in microcolony | Total biomass |
|---------|------------|----------------------|------------------------------|-------------------------|---------------|
| 5627    | 0          | 56.6(13.4)           | 55.7(13.2)                   | 6.1(1.3)                | 118.4(27.9)   |
|         | 5          | 38.4(9.0)            | 61.9(16.2)                   | 66.9(11.1)              | 167.2(36.3)   |
|         | 12         | 24.6(6.3)            | 80.8(21.9)                   | 0                       | 105.4 (28.2)  |
| 5630    | 0          | 96.0(21.9)           | 29.8(9.0)                    | 8.8(2,0)                | 134.6 (32.9)  |
|         | 5          | 123.4(20.3)          | 65.0(17.0)                   | 1.7(0,4)                | 190.1 (37.7)  |
|         | 20         | 67.4(16.9)           | 41.2 (11.2)                  | 0                       | 108.6(28.1)   |
|         | 23         | 62.4(14.5)           | 62.0(16.2)                   | 0                       | 124.4(30.7)   |
| 5631    | 0          | 41.7(10.1)           | 38.3(8.8)                    | 0                       | 80.0(18.9)    |
|         | 10         | 47.1(11.0)           | 23.0(5.7)                    | 0                       | 70.1 (16.7)   |
|         | 18         | 102.8(24.3)          | 23.2(6.1)                    | 0                       | 126.0 (30.4)  |
|         | 25         | 48.5(11.2)           | 25.0(6.1)                    | 0                       | 73.5 (17.3)   |
| 5632    | 0          | 39.9(9.5)            | 20.1(5.0)                    | 0                       | 60.0(14.5)    |
|         | 10         | 60.0(14.5)           | 2.4(0.7)                     | 5.3(1.2)                | 39.7(10.3)    |
|         | 17         | 29.45(7.0)           | 9.7(2.5)                     | 0                       | 39.2 (9.5)    |
|         | 22         | 32.8(7.7)            | 5.3(1.4)                     | 0.8(0.2)                | 38.9(9.3)     |
| 5591-2  | 0          | 39.6(9.2)            | 0.5(0.3)                     | 0                       | 40.1(9.5)     |
|         | 13         | 7.0 (2.0)            | 0.6(0.2)                     | 0                       | 7.6(2.2)      |
|         | 41         | 4.1(1.0)             | 1.8(0.3)                     | 0                       | 5.9(1.3)      |
| 5590-2  | 0          | 16.3 (4.0)           | 1.7(0.5)                     | 0                       | 18.0(4.5)     |
|         | 13         | 7.6(2.0)             | 0.7(0.2)                     | 0                       | 8.3(2.2)      |
|         | 59         | 10.3(2.55)           | 0.1(0.03)                    | 0                       | 10.4(2.58)    |
| 5634    | 0          | 24.9(6.3)            | 0.95 (0.2)                   | 2.2(0.5)                | 28.05(7.0)    |
|         | 10         | 16.8(4.4)            | 3.9(1.0)                     | 0                       | 20.7(5.4)     |
|         | 40         | 6.3(1.6)             | 0                            | 0                       | 6.3(1.6)      |
|         | 60         | 18.3(4.6)            | 0.4(0.1)                     | 0                       | 18.7(4.7)     |
|         | 100        | 12.0(3.0)            | 0.1(0.02)                    | 0                       | 12.1(3.02)    |
|         | 182        | 14.2(3.8)            | 0                            | 0                       | 14.2(3.8)     |
| 5635    | 0          | 15.0(4.1)            | 0.08(0.02)                   | 0.8(0.18)               | 15.88(4.3)    |
|         | 5          | 8.2(2.2)             | 0.24(0.07)                   | 0                       | 8.44(2.27)    |
|         | 27         | 6.8(1.6)             | 0                            | 0                       | 6.8(1.6)      |
|         | 75         | 11.7(2.9)            | 0.02(0.01)                   | 0.9(0.18)               | 12.62(3.09)   |
|         | 140        | 13.8(3.7)            | >0.01                        | 0                       | 13.8(3.7)     |
|         | 320        | 18.1 (4.6)           | 0.02(0.01)                   | 0                       | 18.12(4.61)   |
|         | 850        | 17.1(4.4)            | 0.6(0.2)                     | 0.6(0.1)                | 18.3(4.7)     |

Table S5. Abundance ( $N_{\text{HNF}}$ , cells  $\text{mL}^{-1}$ ) and biomass ( $B_{\text{HNF}}$ ,  $\text{mg C m}^{-3}$ ).

| Station         | Horizon, m | $N_{\text{HNF}}$ | $B_{\text{HNF}}$ |
|-----------------|------------|------------------|------------------|
| 5627            | 0          | 545              | 7.8              |
|                 | 5          | 636              | 9.1              |
|                 | 14         | 434              | 6.2              |
| 5630            | 0          | 273              | 3.9              |
|                 | 5          | 322              | 4.6              |
|                 | 20         | 238              | 3.4              |
|                 | 23         | 175              | 2.5              |
| 5631            | 0          | 259              | 3.7              |
|                 | 10         | 209              | 3.7              |
|                 | 18         | 364              | 5.2              |
|                 | 25         | 294              | 4.2              |
| 5632            | 0          | 343              | 4.9              |
|                 | 10         | 394              | 4.2              |
|                 | 17         | 294              | 4.2              |
|                 | 22         | 245              | 3.5              |
| 5591_2          | 0          | 154              | 2.2              |
|                 | 13         | 76               | 0.8              |
|                 | 41         | 84               | 0.7              |
| 5590_2          | 0          | 198              | 1.4              |
|                 | 13         | 106              | 0.8              |
|                 | 59         | 97               | 0.8              |
| 5634            | 0          | 198              | 1.4              |
|                 | 10         | 156              | 0.8              |
|                 | 40         | 35               | 0.5              |
|                 | 60         | 97               | 0.8              |
|                 | 100        | 77               | 1.1              |
|                 | 182        | 106              | 0.8              |
| 5635<br>(СКЛОИ) | 0          | 91               | 1.3              |
|                 | 5          | 70               | 1.0              |
|                 | 27         | 49               | 0.7              |
|                 | 75         | 91               | 1.3              |
|                 | 140        | 69               | 0.7              |
|                 | 320        | 77               | 1.0              |
|                 | 850        | 109              | 1.0              |
